# Supplementary material
Source: PubMed Central journal article supplement (PMC2449332)
Supplement: 0800650105_Supplemental_PDF.pdf [file 0800650105_Supplemental_PDF.pdf]

# Supporting Information

Kong et al. 10.1073/pnas.0800650105

## SI Materials and Methods

**Real-Time PCR.** Real-time PCR was carried out by using the Stratagene MX3005P QPCR system. 2% of RNA from each gradient fraction was reverse transcribed by using SuperScript III (Invitrogen) and was analyzed by using the QuantiTect SYBR Green PCR kit following the manufacturer's instructions (Qiagen). *Renilla* luciferase cDNA was amplified by using the primers 5'-GGAATTATAATGCTTATCTACGTGC-3' and 5'-CTT-GCGAAAAATGAAGACCTTTTAC-3'. Firefly luciferase cDNA was amplified by using the primers 5'-CTCAGTACAGAC-TACATCAGC-3' and 5'-TCCAGATCCACAACCTTCGC-3'. Actin cDNA was amplified by using the primers 5'-GGCAT-GGGTCAGAAGGATT-3' and 5'-GGGGTGTGTAAG-GTCTCAA-3'.

**Sucrose Density Gradient Centrifugation and RNA Detection.** Sucrose density gradient centrifugation was used to separate ribosomes into polysomal and subpolysomal fractions. Cells ( $6 \times 10^6$ ) were incubated with 0.1 mg/ml cycloheximide for 3 min at 37°C, washed in PBS containing 0.1 mg/ml cycloheximide, and lysed in lysis buffer [15 mM Tris-HCl (pH 7.4), 15 mM MgCl<sub>2</sub>, 0.15M NaCl, 1% Triton X-100, 0.1 mg/ml cycloheximide, and 1 mg/ml heparin]. The nuclei and debris were removed by centrifugation at 12,000 × g for 5 min, and the supernatants were loaded onto 10–50% sucrose gradients composed of lysis buffer lacking Triton X-100. The gradients were sedimented at 38,000 rpm for 120 min in a SW41 rotor at 4°C ( $221,777 \times g$ ). Fractions of equal volume were collected from the top of the gradient directly into guanidine-HCl, at a final concentration of 4M, using an ISCO fraction collector system. RNA was precipitated by addition of 2 volumes of ethanol and resuspended in 1 mM Tris-HCl (pH 8). All fractions were subjected to DNase I treatment to remove contaminating plasmid DNA. Quantification of northern analysis was performed on "QuantityOne" HD analysis software from Bio-Rad after scanning on Bio-Rad molecular Imager FX.

**Electroporation.** Transfections were carried out by using the Nucleofector II from Amaxa Biosystems. HeLa cells ( $1 \times 10^6$ ) were resuspend in the Nucleofector Solution R and mixed with 1 μg of DNA. The DNA-cell mix was then transferred into an cuvette, and transfection was carried out by using Nucleofector program I13. The appropriate number of cells were then plated onto a 24 well plate and harvested 48 h after transfection.

**Generation of the pRLSV40L78.** Oligonucleotides containing the let-7A miRNA binding sites were cloned into the XbaI site of the plasmid pRL-SV40 from Promega (see below). This was repeated four times to generate pRLSV40L78.

**Oligonucleotide: XhoI EcoRV XbaI.** 5'-CTAGCTCGAGAA-CTATAAACGCTCTACCTCAGATATCAACTATAAACGTC-TACCTCAT-3'.

3'-GAGCTCTTGATATGTTGCAGATGGAGTCTATAGTT-GATATGTTGCAGATGGAGTAGATC-5'.

agatctgcgcagcaccatggcctgaaataacctctgaaagaggaacttggt-aggtacctctgagggcgaagaaccagctgtggaatgtgtcagttagggtgt-gaaagtccccaggctccccagcaggcagaagtatgcaaacgatcatctcaatt-agtcagcaaccaggtgtggaagtccccaggctccccagcaggcagaagtatg-caaagatgatctcaattagtcagcaacctagtcgcccccctaacctcgccc-atcccccccctaacctcgcccaggtccgccattctcgcccctagctgactaa-tttttttttatgtagagccgagggcgcctcggcctctgagctattccagaag-tagtgaggaggccttttggaggcctagcttttgcataaacgcttattctctgac-

acaacagctctgaacttaagctgcagaagttggctgtaggcactgggcaggt-a-gtatcaaggtacaagacaggttaaggagaccaatagaactgggctgtgc-gagacagagaagactcttgcgtttctgataggcactattggtcttactgacatc-cactttgcttctctccacaggtgctccactccagttcaattacagctcttaagg-ctagagtacttaatacagactcactataggttagccaccatgacttcgaaagttt-atgatccagaacaaggaaacggatgataactggctccgcagtggtggccagat-gtaaacaaatgaatgttcttgattcatttataattattatgattcagaaaaacat-gcagaaaaatgctgttattttttacatggtaacggcgcctcttcttattatggcga-catgttggccacatattgagccagtagcgcgggtgattataccagaccttattg-atatgggcaaatcagcgaactctggtaatggttctttaggttacttgatcatt-a-caaatacttactgcatggttgaacttcttaattaccaaagaagatcattttgt-gcggcatgattggggtgcttggcatttcattatagctatgagcatcaagata-zhyagatcaaaagcaatagttcacgctgaaagtgtagtagatgtgattgaatcat-gggatgaatggcctgatattgagaagatattgcgttgatcaaatctgaaagaag-gagaaaaatggtttggagaataacttctctgtagaaacctggtgccatcaaa-aatcatgagaaaagttagaccagaagaattgcagcattcttgaaccattca-a-agagaaaggtgaagttcgtctgctccaactatcatggcctgtgaaatccccgtt-agtaaaaggtgtaaacctgacgttgtaacaattgttaggaattataatgcttct-tacgtgcaagtgtattaccaaaaatggttattgaaatcggaccaggattcttt-tccaatgctattgtgaaagtgcaagaagtttctaatactgaattgtcaaaagta-aaggtcttcttttcgcaagaagatgcacctgatgaaatgggaaaaatataca-a-atcgttctgtagcaggttctcaaaaatgacaatattctagagcggccgcttc-gagcagacatgataagatacattgagttgtggaacaaccacaactagaatg-cagtgaaaaaaatgctttattgtgaaattgtgatgctattgctttattgtaac-cattataagctgcaataaacaagttacaacaacaattgcattcattttatgttca-gggtcagggggaggtggtgggaggttttaaaagcaagtaaaacctctacaatgt-gtaaaatcgataaaggatccaggtggcacttttcggggaaatgtgcgccaaccc-tatttgtttatttttcaataacattcaaatatgtatccgctcatgagacaataac-cctgataaagcttcaataatattgaaaaggaagatgagttcaacattt-cctgctgccttattccccttttgcggcatttgcctctctgttttgcctaccca-gaaaacgctggtgaaagttaaagatgctgaagatcagttgggtgacagtggtg-tacatcgaaactggatctcaacagcggtaagatccttgagagtttgcccccga-a-gaacgtttccaatgatgacacttttaagttctgctatgtggcggcgttattat-c-cgtattgacgcggcgaagagcaactcgtctgcgcgatacactattctcaga-a-tgacttgggtgagtagtaccagtcacagaaaagcatcttaccgatggcatgacag-taagagaattatgcagtgctgccataaacatgagtgataaacctgcggccaactt-acttgacaacgatcggaggaccgaaggactaacgccttttgcacaacatggg-ggatcatgtaactgccttgatcgttgggaaccggagctgaatgaagccatacca-aacgacgagcgtgacaccacagatgctgtagcaatgcaacaacgttgcgcaaac-tattaactggcgaactacttactctagcttcccggcaacaatataagactggat-ggagcggataaaagtgcaggaccacttctgcgctcggccctcggctggctg-gttattgctgataaactggagccggtgagcgtgggtctcgggtatcattgacagctg-gggccagatggttaagcctcccgtatcgtatgattatctacacagcggggagtcag-gcaactatggatgaaagcaaatagacagatcgtgagataggtgctcactgat-taagcattggttaactgtagaccaagtttactcatatatactttagattgattta-a-aacttcttttaatttaaaggatctaggtgaagatccttttgataatctatga-ccaaaatcccttaacgtgagtttctgctccactgagcgtcagaccctgtagaaa-a-gatcaaaagatcttctgagatcctttttctgcgctaatctgctgcttgcaca-a-aaaaaacaccgctaccagcgggtgttggcttgcggatcaagagctaccaacttt-tcccgaaggttaactggctcagcagagcgcagataccaactgttcttctag-t-gtagcctgagttagccaccactcaagaactctgtagaccgctcactacatcct-cgctctgtaaatcctgttaccagtgctgctccagtgccgataaagctgtgcttacc-g-ggttgactcaagacgatagttaccggataaaggcgcagcggctcggctgacg-gggggctcgtgcacacagcccagcttgagcgaacgacctacaccgaaactgagat-acctacagcgtgagctatgagaaagcaccgcttcccgaaggagaaagggcga-caggtatccggtaagcggcaggtcggaaacagagagcgcacgagggagcttc-cagggggaaacgcctggtatctttatgctcctggttccggcactctgactt-gagcgtgatttttggatgctcgcaggggggagcctatggaaaaaacgc-c-agcaacggccttttaccggttctggccttttgccttctgctcactgctcag.

**Generation of pRLTK and pRLTKL78.** To create the constructs pRLTK and pRLTKL78, the TK promoter (sequence shown











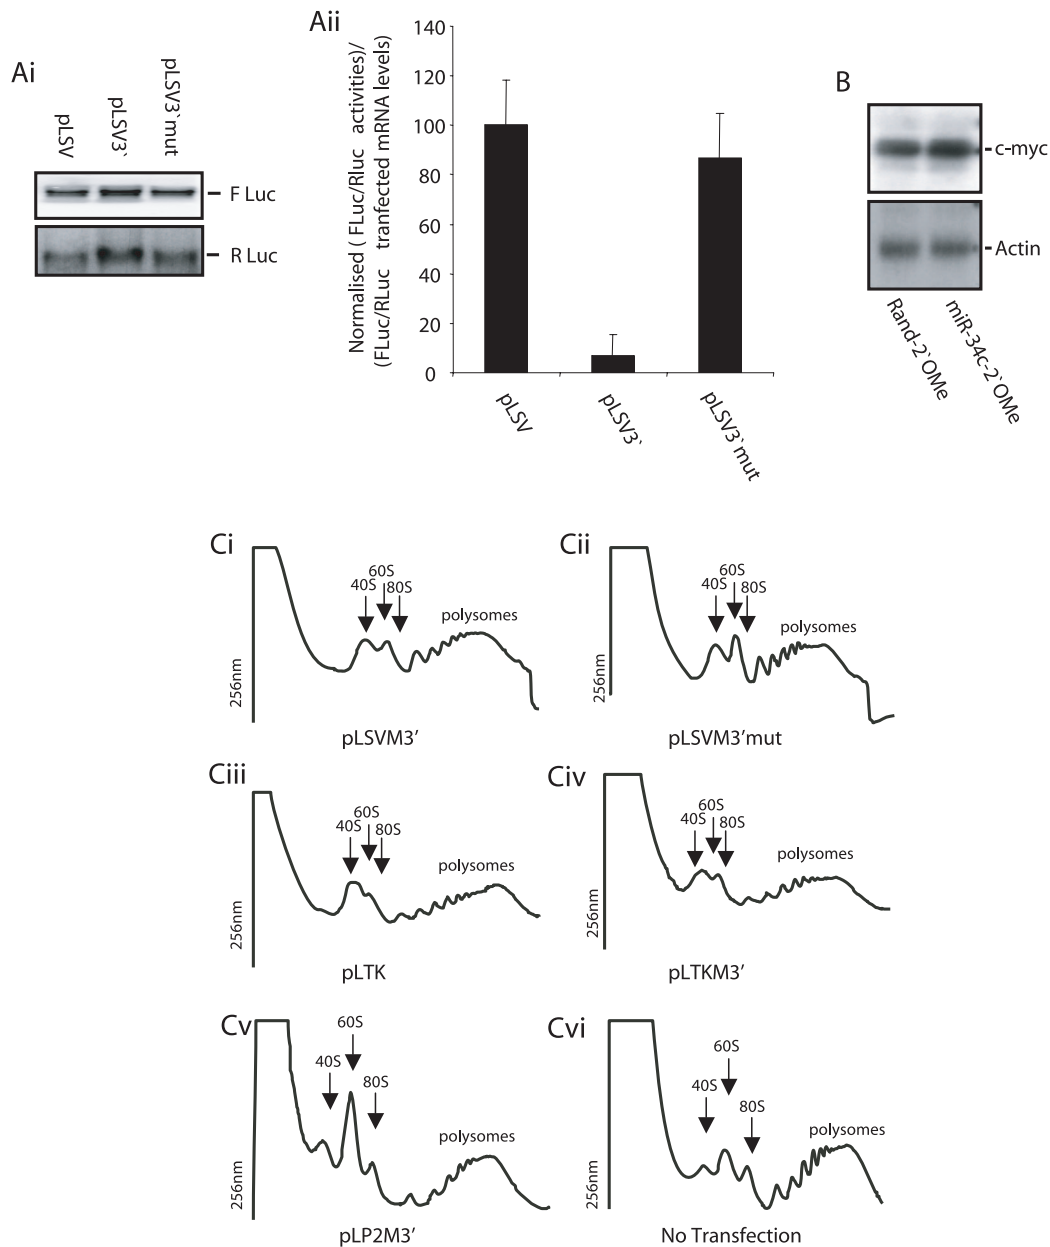

**Fig. 53.** (A) Normalization of *Renilla* luciferase activity to transfection efficiency shows a similar degree of translation repression to that seen in Fig. 3Bii, when data were normalized to *Renilla* mRNA. (A) Northern analysis of total Firefly and *Renilla* luciferase mRNA levels from HeLa cells transfected as in Fig. 3Bi. (Aii) Normalized values for luciferase activity in HeLa cells from Fig. 3Bi. [Firefly luciferase activity/*Renilla* luciferase activity]/(Firefly luciferase mRNA level (Ai))/(*Renilla* luciferase mRNA level (Ai)). (B) *c-myc* mRNA level do not change after treatment of cells with 2'-O-methyl oligonucleotides directed against miR-34c. Northern analysis was performed on cells transfected with 2'-O-methyl oligonucleotides directed against miR-34c or a control oligonucleotide. Membranes were subsequently probed with radiolabeled DNA derived from *c-myc* and actin as indicated. (C) Accompanying polysome profiles from Fig. 3F. (Ci) Sucrose density profile of HeLa cells transfected with pLSVM3'. Ribosomal subunits and polysome locations are marked above the A256 trace. (Cii) Sucrose density profile of HeLa cells transfected with pLSVM3' mut. Ribosomal subunits and polysome locations are marked above the A256 trace. (Ciii) Sucrose density profile of HeLa cells transfected with pLTK. Ribosomal subunits and polysome locations are marked above the A256 trace. (Civ) Sucrose density profile of HeLa cells transfected with pLTKM3'. Ribosomal subunits and polysome locations are marked above the A256 trace. (Cv) Sucrose density profile of HeLa cells transfected with pLP2M3'. Ribosomal subunits and polysome locations are marked above the A256 trace. (Cvi) Sucrose density profile of control HeLa cells, no transfection. ribosomal subunits and polysome locations are marked above the A256 trace. (D) Actin mRNA distribution across polysome gradients accompanying Fig. 3F. Membranes from Fig. 3F were hybridized for actin mRNA. Transfected constructs are indicated. (Ei) Quantification of northern analysis of firefly luciferase mRNA in each fraction shown in the Fig. 3F Upper, expressed as a percentage of total firefly luciferase mRNA detected. (Eii) Quantification of northern analysis of actin mRNA in each fraction shown in C, expressed as a percentage of total actin mRNA detected. These profiles correspond to gradients in the Fig. 3F Upper, as indicated. (Eiii) Quantification of northern analysis of firefly luciferase or *c-myc* mRNA shown in the Fig. 3F Lower expressed as a percentage of the total of that mRNA detected. (F) qRT-PCR of total firefly luciferase mRNA levels normalized to actin mRNA levels from HeLa cells transfected with either pLTK, pLTKM3', pLP2, or pLP2M3'.









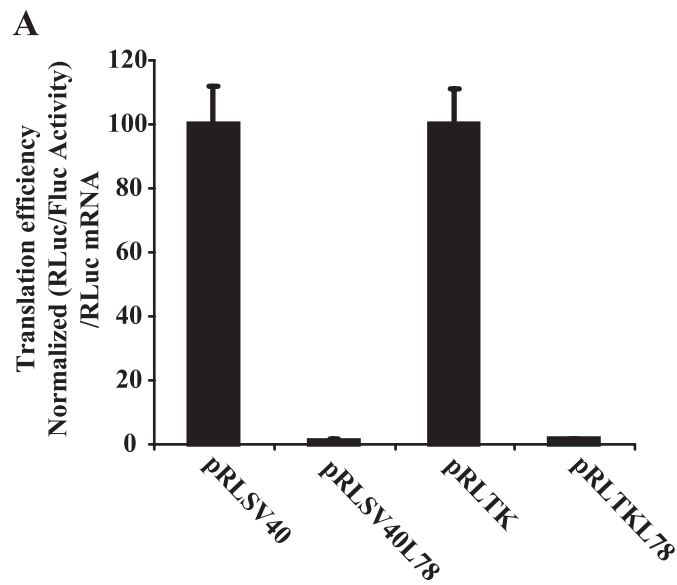

**Fig. S5.** The method of transfection does not significantly affect the degree of microRNA repression. (A) HeLa cells were transfected by using the constructs shown in Fig. 1A by electroporation, using Amaxa Nucleofector II and Kit R per the manufacturer's instructions (Amaxa Biosystems) (Fig. 1A). Lysates from transfected cells were assayed for luciferase activity, and *Renilla* luciferase levels were normalized to the transfection control, firefly luciferase. In parallel, total mRNA was prepared, quantified by real-time PCR and values were normalized to *Renilla* luciferase mRNA levels as a measure of translational efficiency. Experiments were performed in triplicate on three independent occasions.
